# Supplementary material
Source: publisher site journal article supplement (https://www.spandidos-publications.com/7187/downloadSupplementary)

Figure S1. H&E staining of cervical cytology from cervical curettage revealed invasive squamous cell carcinoma (scale bar, 100  $\mu$ m).

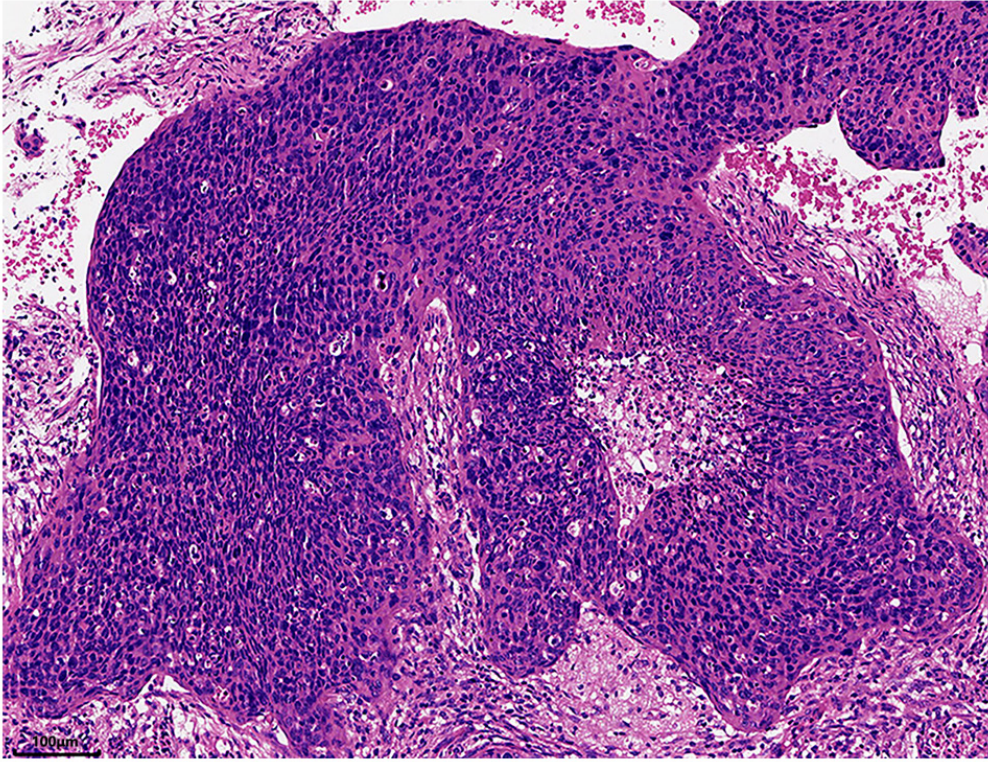

Supplement: Supplementary file 1 [file downloadSupplementary]
